# Supplementary material for: The role of Xist‐mediated Polycomb recruitment in the initiation of X‐chromosome inactivation
Source: PubMed Central journal article supplement (PMC6776897; doi:10.15252/embr.201948019), 2019-08-27
Supplement: EMBR-20-e48019-s001.pdf [file EMBR-20-e48019-s001.pdf]

| <i>Xist</i> mutants         | 5'end /3'end sgRNAs                            | Primers to confirm deletion (F/R)              | Primers to confirm loss of WT sequence (F/R)      |
|-----------------------------|------------------------------------------------|------------------------------------------------|---------------------------------------------------|
| <i>Xist</i> $\Delta$ F+B+C  | TCACGCAGAAGCCATAATGG/<br>CTTGAGAGATGATACCTCCA  | CTGCTGATCGTTTGGTGCTG/<br>CAGACCTGTGTTTGCCCCTT  | CTGCTGATCGTTTGGTGCTG/<br>ATCAAGGCCGAATCCCGCAAC    |
| <i>Xist</i> $\Delta$ F+B    | TCACGCAGAAGCCATAATGG/<br>AGGGCTGGACTGGATTGGGT  | TGGTGCTGTGTGAGTGAACC/<br>TTAGCACTGAATCAATGAAGA | CTGCTGATCGTTTGGTGCTG/<br>ATCAAGGCCGAATCCCGCAAC    |
| <i>Xist</i> $\Delta$ B+C    | TATAACAGTAAGTCTGATAG/<br>GTGTATCTTGATTAACATGA  | ATGACTGGATGTCAGGAGTA/<br>CAGACCTGTGTTTGCCCCTT  | ATGACTGGATGTCAGGAGTA/<br>CTGAGTCTTGAGGAGAATCT     |
| <i>Xist</i> $\Delta$ B+1/2C | TATAACAGTAAGTCTGATAG/<br>CATACTGACTTCTAGAGTCA* | ATGACTGGATGTCAGGAGTA/<br>CAGACCTGTGTTTGCCCCTT  | ATGACTGGATGTCAGGAGTA/<br>CTGAGTCTTGAGGAGAATCT     |
| <i>Xist</i> $\Delta$ B      | TATAACAGTAAGTCTGATAG/<br>CTCTAAGTAGAAGTGGGCTT  | ATGACTGGATGTCAGGAGTA/<br>TTAGCACTGAATCAATGAAGA | ATGACTGGATGTCAGGAGTA/<br>CTGAGTCTTGAGGAGAATCT     |
| <i>Xist</i> $\Delta$ C      | CTCTAAGTAGAAGTGGGCTT/<br>GTGTATCTTGATTAACATGA  | CCAGGCCAGATACTTTCAG/<br>CAGACCTGTGTTTGCCCCTT   | TCCATGGACAAGTAAACAAAGA<br>A/ TGTTTGCCCCTTGTCTAAAT |

**Appendix Table 1 – List of gRNA sequences and primers used for *CRISPR/Cas9* editing of the different *Xist*-TetOP mutants**

Primer sequences to confirm deletion and loss of wild-type (WT) allele are displayed for each *Xist* mutant; \* highlights for the fact that the 3'end gRNA used to generate  $\Delta$ B+1/2C was designed to a unique region within the repeat C, but several sequences with only 1 or 2 mismatched can be found within this repeat and are likely to be targeted to generate different types of  $\Delta$ B+1/2C mutants.

| RT-PCR analysis             | Sequences (F/R)                                     |
|-----------------------------|-----------------------------------------------------|
| <i>Xist</i> exon 1- exon 3  | GCTGGTTCGTCTATCTTGTGGG /<br>CAGAGTAGCGAGGACTTGAAGAG |
| <i>Xist</i> before repeat B | ATGACTGGATGTCAGGAGTA /<br>CTGAGTCTTGAGGAGAATCT      |
| <i>Xist</i> before repeat C | TCCATGGACAAGTAAACAAAGAA /<br>TGTTTGCCCCTTTGCTAAAT   |
| <i>Gapdh</i>                | AACTTTGGCATTGTGGAAGG /<br>ACACATTGGGGGTAGGAACA      |
| 18S                         | GGGAGCCTGAGAAACGGC /<br>GGGTCGGGAGTGGGTAATTT        |

**Appendix Table S2- Primer sequences for RT-PCR analysis of *Xist* mutants (used in Fig. EV1B)**

| Exon 1 - 5' end Set | Oligo-probes          |
|---------------------|-----------------------|
| 1                   | gtctgataacagacctgtgt  |
| 2                   | tfaatggccaatgccttgaa  |
| 3                   | gcagagggttttgctgaaa   |
| 4                   | agggtagtattaggacctg   |
| 5                   | aggggactgaacaactgca   |
| 6                   | gtatgagggtatgggatctt  |
| 7                   | agagaagtggctcattggt   |
| 8                   | gtgcacacaacaggcaca    |
| 9                   | tccaatgcttaggaagaggg  |
| 10                  | tctcaccagatgcagatta   |
| 11                  | gcacaactgtggacatgaga  |
| 12                  | gtacaggagtcctgatctaa  |
| 13                  | gcttatattagtggacctc   |
| 14                  | tcttacctgaaggaccatt   |
| 15                  | agtttgaggaaggggttca   |
| 16                  | gcctactacaatcagtcatt  |
| 17                  | gttccttctgtagtgaaca   |
| 18                  | aagggtacatgttatggcca  |
| 19                  | tgagagtaggatcgtatcca  |
| 20                  | gagtggaaggaggggacag   |
| 21                  | tcatgtcctgttatataca   |
| 22                  | gcaggagtgaagagataca   |
| 23                  | attaatggtccactagcagg  |
| 24                  | gcatacctgatatagtga    |
| 25                  | aaagaatgcggcctgttga   |
| 26                  | atcctttcaagtgcacagag  |
| 27                  | ctctttctgctttaaagcgg  |
| 28                  | attaatatgcctctggtgct  |
| 29                  | cagggtcatatgtgaagggt  |
| 30                  | gtaggcatttcagaaccttt  |
| 31                  | ctcagcaacctctgcaataa  |
| 32                  | tgctattaagagtcccaa    |
| 33                  | ataaacatccagaactgcc   |
| 34                  | aaactagcaggggatttgct  |
| 35                  | ctctccttaatgatgggt    |
| 36                  | aggcaaaagggtatggcatga |
| 37                  | agtcaagagaagggcttgc   |
| 38                  | aactgagacactgtagccat  |
| 39                  | catagggtgtttgggtaat   |
| 40                  | tgtaaaggaaagcccaagt   |
| 41                  | aaagtgctaagcttctct    |
| 42                  | taactttctggcagttggt   |
| 43                  | ttgcaatccaaatgcctttc  |
| 44                  | tcagtacactgagacactgc  |
| 45                  | agaaggcttaggtcatcttc  |
| 46                  | ttgccagagttaatggtgg   |
| 47                  | ttctcagtaatgctgggaga  |
| 48                  | ctgcactggatgagttactt  |

| Exon 7 Set | Oligo-probes          |
|------------|-----------------------|
| 1          | acaggcaccagagaaagtga  |
| 2          | gagccatagctagtgaagac  |
| 3          | agattatttctcagggcagt  |
| 4          | gaccggacggaatgatgtat  |
| 5          | acttcagagccactgaaac   |
| 6          | tcacagggtcctgtagaaa   |
| 7          | tatgcttgacttagctcag   |
| 8          | ctttatgggcaatggcaaca  |
| 9          | agaccttgcacaatactat   |
| 10         | caaatggctaagaccagtt   |
| 11         | gatttagtccgtctcaagt   |
| 12         | tatgcatgcttattcttagg  |
| 13         | aggatggcagtatgcatatc  |
| 14         | tttcttagatagcctgaca   |
| 15         | tagaaaaccataccctgctc  |
| 16         | actactatgagcagggagtt  |
| 17         | tcagggtactagtctgatgc  |
| 18         | tcagggtgatcaagtaca    |
| 19         | ttcatacgttctctggttac  |
| 20         | ggaagttacagtaggcttca  |
| 21         | gcatgttattcctagagcaa  |
| 22         | cctattttataggcagcttt  |
| 23         | gtgcatgctgggataaaaag  |
| 24         | acaagctccacacagatct   |
| 25         | gtggtgttaggtgataagca  |
| 26         | tctatgtgttcgctcaacac  |
| 27         | tttggctagatttctacc    |
| 28         | taacatttagcacactgcct  |
| 29         | ggaagttatcctagacagcat |
| 30         | tttactggcaaggtgtttgt  |
| 31         | tcactctggcctataaaaac  |
| 32         | aggacctaggttagcatatt  |
| 33         | aggaagtctccagtttatgt  |
| 34         | ctgagccaggcaatgaacaa  |
| 35         | ctgtagtctcaaggtgtgac  |
| 36         | tgttttccagctaaagtg    |
| 37         | ggaggggagcaactttttat  |
| 38         | agtagcatctctgcaatgt   |
| 39         | ctgtaagtcacactgagtgc  |
| 40         | ttcaacctctgaggcaact   |
| 41         | tcctgtagaacaggcgaac   |
| 42         | agggtctgttaactttagg   |
| 43         | cttaactgtttcattccca   |
| 44         | agctcaaggcaacttggat   |
| 45         | gtaacacttttgatgccaa   |
| 46         | gaaatgtaagccattccta   |
| 47         | gatgatggttaggatgtgctt |
| 48         | cagttggtgggaagatgact  |

Appendix Table S3 – Sequences of the two sets of Stellaris RNA FISH oligo-probes
